# Supplementary material
Source: ML conference proceedings conference paper supplement (https://openreview.net/forum?id=SCg9JDUscgq)
Supplement: supplementary_material [file attachment]

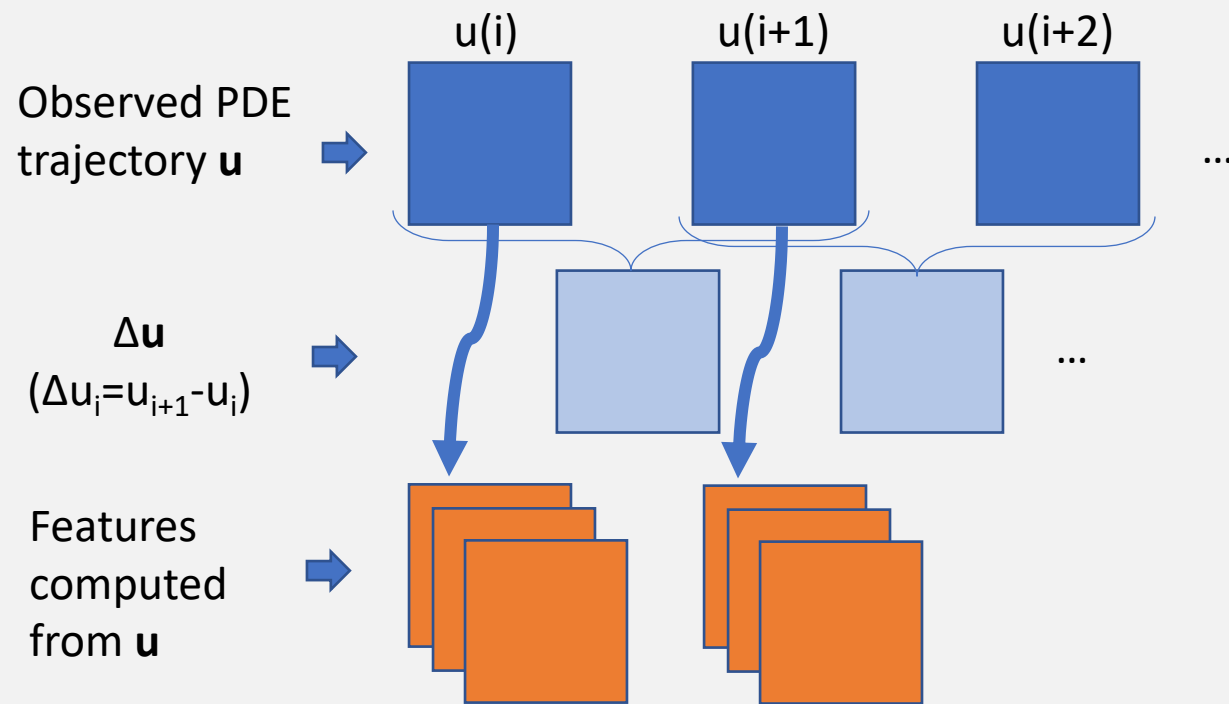

Step 1: Feature extraction and System change computation

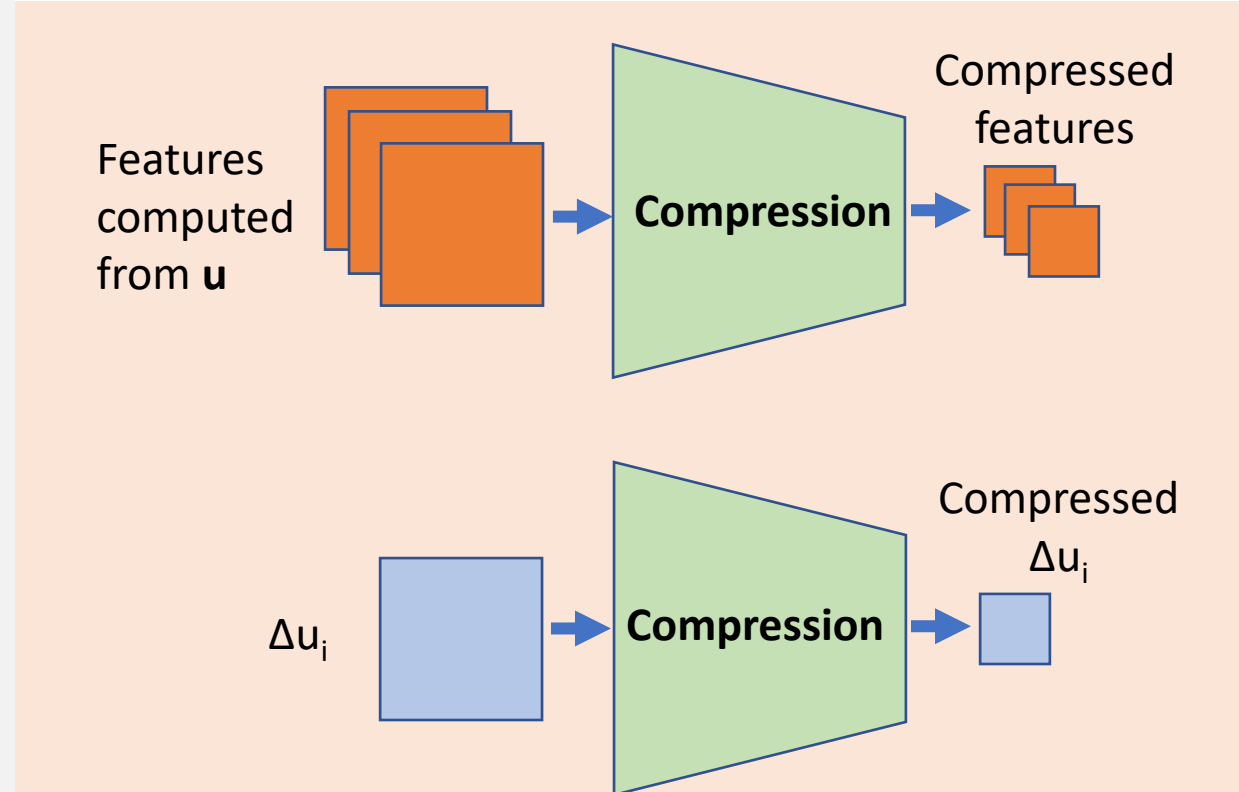

Step 2: One time projection

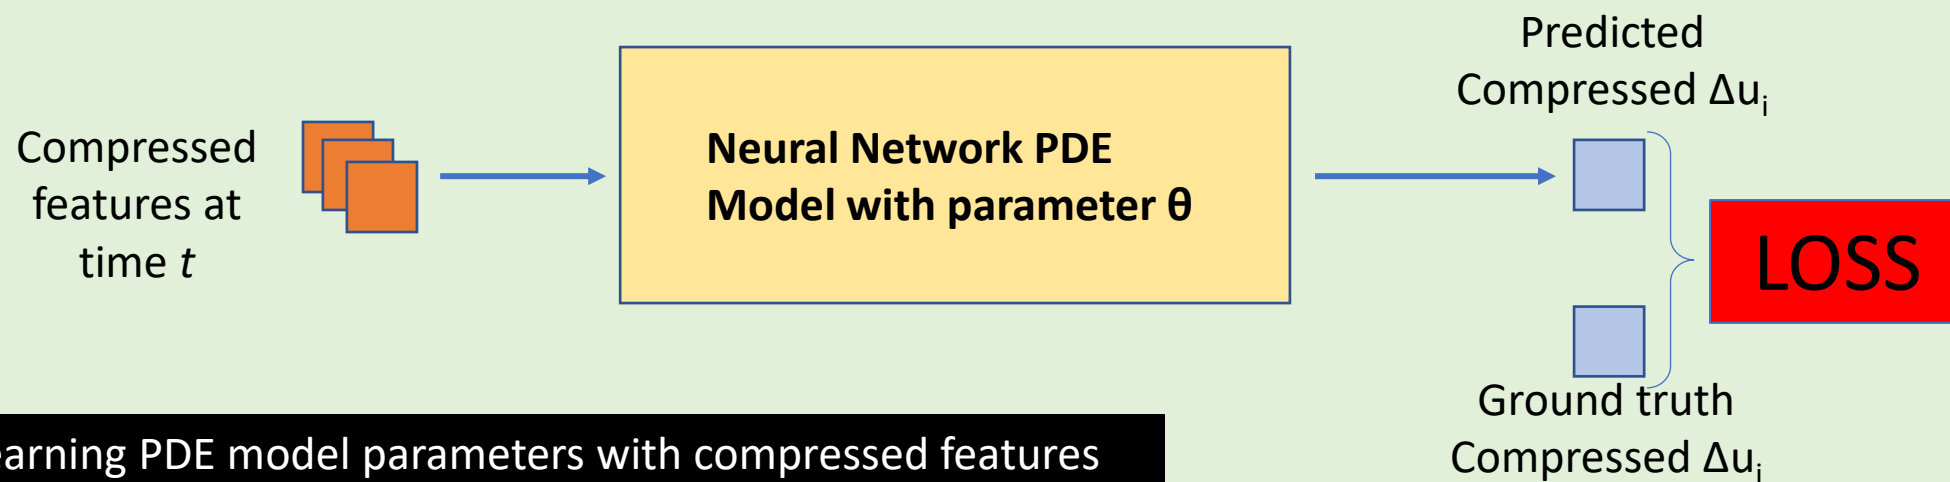

Step 3: Learning PDE model parameters with compressed features
